# Supplementary material
Source: PubMed Central journal article supplement (PMC3562998)
Supplement: NIHMS432093-supplement-Supplementary.pdf [file NIHMS432093-supplement-Supplementary.pdf]

**Table S1.** Statistical analysis of the energy minimized family of conformers and of the mean structure of apoNTKII from *Listeria monocytogenes*.

|                                                                                   | REM <sup>a</sup> | <REM> <sup>a</sup> |
|-----------------------------------------------------------------------------------|------------------|--------------------|
| <b>RMS violations per meaningful distance constraint (Å)<sup>b</sup></b>          | (20 structures)  | (mean)             |
| Intraresidue (238)                                                                | 0.0168 ± 0.0025  | 0.0183             |
| Sequential (314)                                                                  | 0.0212 ± 0.0019  | 0.0186             |
| Medium range <sup>c</sup> (266)                                                   | 0.0975 ± 0.0021  | 0.0082             |
| Long range (451)                                                                  | 0.0189 ± 0.0014  | 0.0190             |
| Total (1269)                                                                      | 0.0177 ± 0.0009  | 0.0170             |
| <b>RMS violations per meaningful dihedral angle constraints (deg)<sup>b</sup></b> |                  |                    |
| φ (45)                                                                            | 0.5865 ± 0.4500  | 0.00               |
| ψ (37)                                                                            | 0.00             | 0.00               |
| χ <sub>1</sub> (44)                                                               | 0.3074 ± 0.2500  | 0.00               |
| <b>Average number of violations per structure</b>                                 |                  |                    |
| Intraresidue                                                                      | 6.45 ± 1.50      | 7                  |
| Sequential                                                                        | 6.30 ± 1.10      | 5                  |
| Medium range <sup>c</sup>                                                         | 3.95 ± 1.24      | 4                  |
| Long range                                                                        | 12.45 ± 1.68     | 11                 |
| Total                                                                             | 29.15 ± 2.60     | 27                 |
| φ                                                                                 | 1.06 ± 0.86      | 0                  |
| ψ                                                                                 | 0.00             | 0                  |
| χ <sub>1</sub>                                                                    | 0.66 ± 0.41      | 0                  |
| <b>Average no. of NOE violations larger than 0.3 Å</b>                            |                  |                    |
|                                                                                   | 0.0 ± 0.0        | 0.00               |
| <b>Average NOE target function (Å<sup>2</sup>)</b>                                |                  |                    |
|                                                                                   | 0.43 ± 0.04      | 0.40               |
| <b>Average angle target function (rad<sup>2</sup>)</b>                            |                  |                    |
|                                                                                   | 0.05 ± 0.01      | 0.04               |
| <b>RMSD to the mean structure (Å) (BB)<sup>d</sup><br/>(HA)</b>                   |                  |                    |
|                                                                                   | 0.42 ± 0.09 Å    | 1.17 ± 0.07        |
| <b>Structural analysis<sup>e</sup></b>                                            |                  |                    |
| % of residues in most favorable regions                                           | 78.6             | 84.1               |
| % of residues in allowed regions                                                  | 15.6             | 11.1               |
| % of residues in generously allowed regions                                       | 4.9              | 3.2                |
| % of residues in disallowed regions                                               | 1.0              | 0.0                |
| H-bond energy (kJ mol <sup>-1</sup> )                                             | 2.86 ± 0.12      | 2.84               |
| Overall G-factor                                                                  | -0.22 ± 0.02     | -0.22              |

<sup>a</sup>REM indicates the energy minimized family of 20 structures, <REM> is the energy minimized average structure of the ensemble.

<sup>b</sup>The number of meaningful constraints for each class is reported in parenthesis.

<sup>c</sup>Medium range distance constraints are those between residues (i,i+2), (i,i+3), (i,i+4) and (i,i+5).

<sup>d</sup>The RMSD to the mean structure is reported considering residues (4-68).

<sup>e</sup>Resulted from the Ramachandran plot analysis. In the PROCHECK statistics, the average hydrogen-bond energy within 2.5-4.0 kJ mol<sup>-1</sup> and overall G-factor over -0.5 is expected to be a good-quality structure.

**Table S2.** Acquisition parameters for NMR experiments performed on apo and CdNTKII from *Listeria monocytogenes*.

| Experiments <sup>a</sup>                                                         | Dimension of acquired data (nucleus) |                       |                       | Spectral width (ppm) |                |                | n <sup>b</sup> |
|----------------------------------------------------------------------------------|--------------------------------------|-----------------------|-----------------------|----------------------|----------------|----------------|----------------|
|                                                                                  | t <sub>1</sub>                       | t <sub>2</sub>        | t <sub>3</sub>        | F <sub>1</sub>       | F <sub>2</sub> | F <sub>3</sub> |                |
| [ <sup>1</sup> H- <sup>1</sup> H]-NOESY <sup>c</sup>                             | 1024( <sup>1</sup> H)                | 2048( <sup>1</sup> H) |                       | 15                   | 15             |                | 64             |
| [ <sup>1</sup> H- <sup>1</sup> H]-TOCSY <sup>d</sup>                             | 1024( <sup>1</sup> H)                | 2048( <sup>1</sup> H) |                       | 15                   | 15             |                | 64             |
| <sup>1</sup> H- <sup>15</sup> N-HSQC <sup>c</sup>                                | 512( <sup>15</sup> N)                | 1024( <sup>1</sup> H) |                       | 40                   | 15             |                | 8              |
| <sup>2</sup> J <sub>NH</sub> - <sup>1</sup> H- <sup>15</sup> N-HSQC <sup>e</sup> | 256( <sup>15</sup> N)                | 2048( <sup>1</sup> H) |                       | 180                  | 25             |                | 64             |
| <sup>15</sup> N-edited [ <sup>1</sup> H- <sup>1</sup> H]-NOESY <sup>c</sup>      | 272( <sup>1</sup> H)                 | 40( <sup>15</sup> N)  | 1024( <sup>1</sup> H) | 15                   | 40             | 15             | 16             |
| HNHA <sup>c</sup>                                                                | 128( <sup>1</sup> H)                 | 40( <sup>15</sup> N)  | 1024( <sup>1</sup> H) | 15                   | 40             | 15             | 16             |
| HNHB <sup>f</sup>                                                                | 128( <sup>1</sup> H)                 | 40( <sup>15</sup> N)  | 1024( <sup>1</sup> H) | 15                   | 40             | 15             | 32             |
| <sup>15</sup> N R <sub>1</sub> <sup>g</sup>                                      | 256( <sup>15</sup> N)                | 2048( <sup>1</sup> H) |                       | 40                   | 15             |                | 8              |
| <sup>15</sup> N R <sub>2</sub> <sup>g</sup>                                      | 256( <sup>15</sup> N)                | 2048( <sup>1</sup> H) |                       | 40                   | 15             |                | 8              |
| <sup>1</sup> H- <sup>15</sup> N NOEs <sup>g</sup>                                | 256( <sup>15</sup> N)                | 2048( <sup>1</sup> H) |                       | 40                   | 15             |                | 48             |

<sup>a</sup>All 3D and 2D spectra were collected at 298 K, processed using the standard Bruker software (XWINNMR) and analyzed through the XEASY program. <sup>b</sup>Number of acquired scans. <sup>c</sup>Data acquired on the 700 MHz spectrometer. 2D NOESY and 3D NOESY-<sup>15</sup>N HSQC maps were acquired with a mixing time of 100 ms and a recycle time of 1.5 s. <sup>d</sup>2D TOCSY spectra were recorded on the 600 MHz spectrometer with a spin-lock time of 90 ms and a recycle time of 1.5 s. <sup>e</sup>To identify the tautomeric state of His 62, a <sup>1</sup>H-<sup>15</sup>N HSQC experiment was performed for measuring <sup>2</sup>J<sub>NH</sub> coupling constants within the His ring. In this experiment, the INEPT delay was set to 22 ms. <sup>f</sup>Data acquired on a 500 MHz spectrometer equipped with a triple resonance cryoprobe. <sup>g</sup>In all experiments the water signal was suppressed with 'water flipback' scheme. A recycle delay of 3 s was used for R<sub>1</sub> and R<sub>2</sub> relaxation experiments, while of 5 s for <sup>1</sup>H-<sup>15</sup>N NOE experiments. A refocusing delay of 450 μs were used in the R<sub>2</sub> measurements.

**Fig. S1.**  $^{15}\text{N}$  relaxation parameters  $R_1$ ,  $R_2$  and heteronuclear NOE versus residue number of apoNTKII (A) and CdNTKII (B) collected at 600 MHz.

**Fig. S2.** Spectral density functions  $J(\omega_N)$ ,  $J(\omega_H)$  and  $J(0)$  versus the residue number as obtained from  $^{15}\text{N}$  relaxation data of apoNTKII (A) and CdNTKII (B).

**A**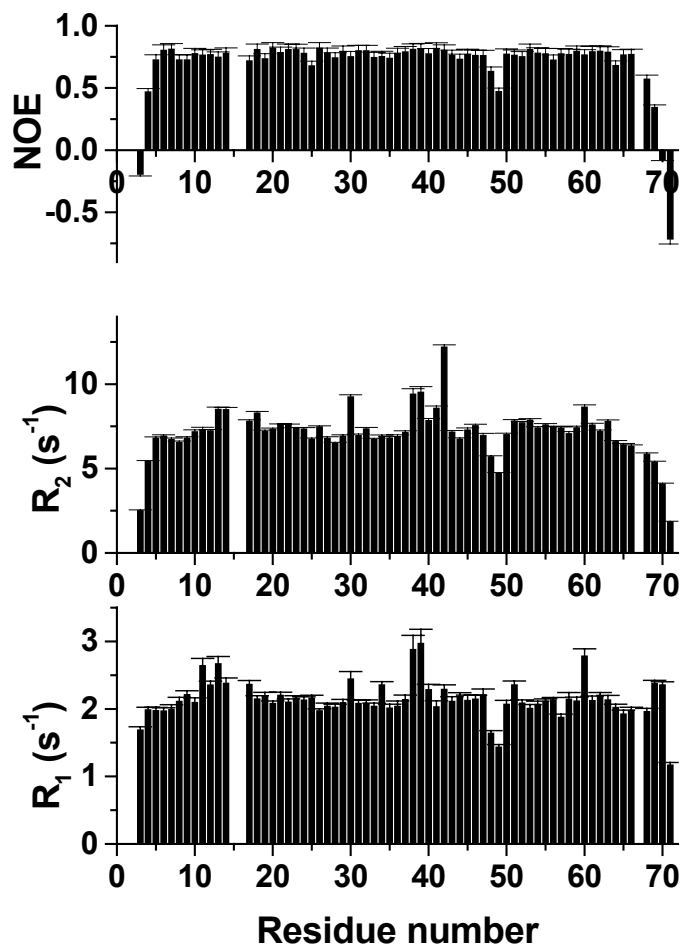**B**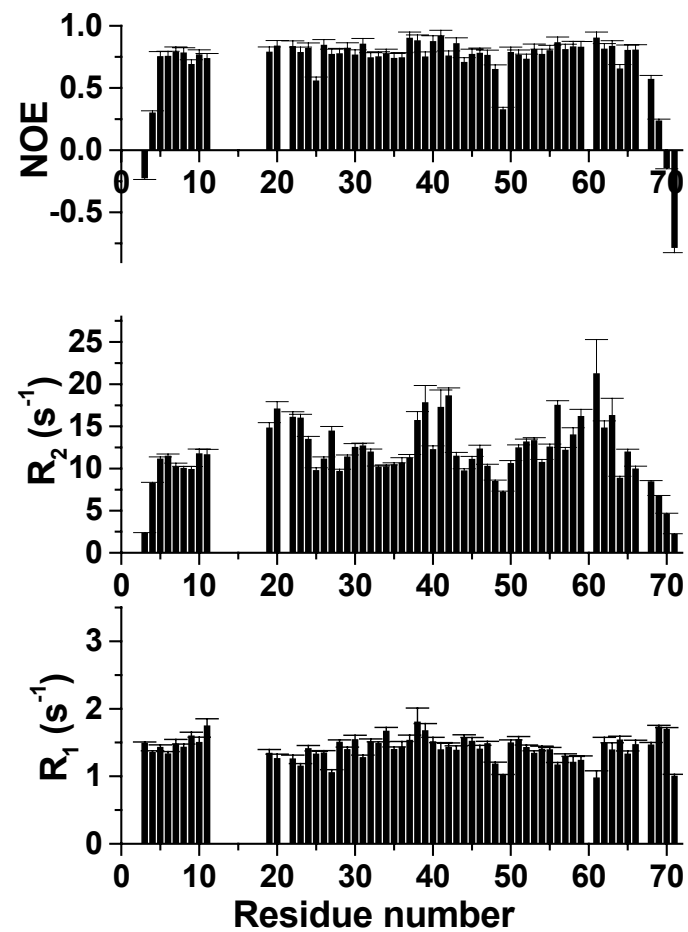**Fig. S1**

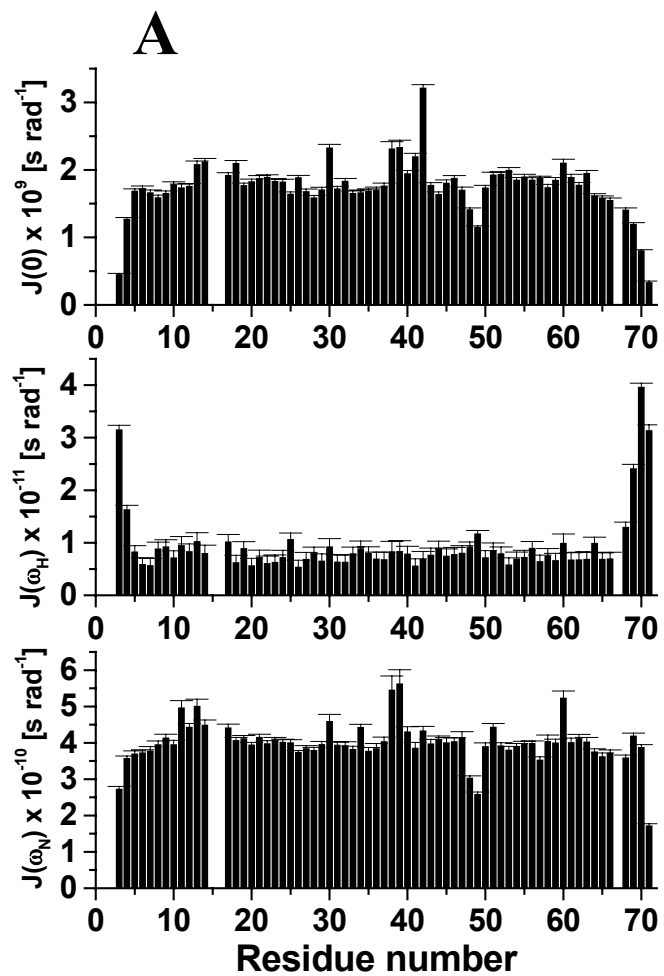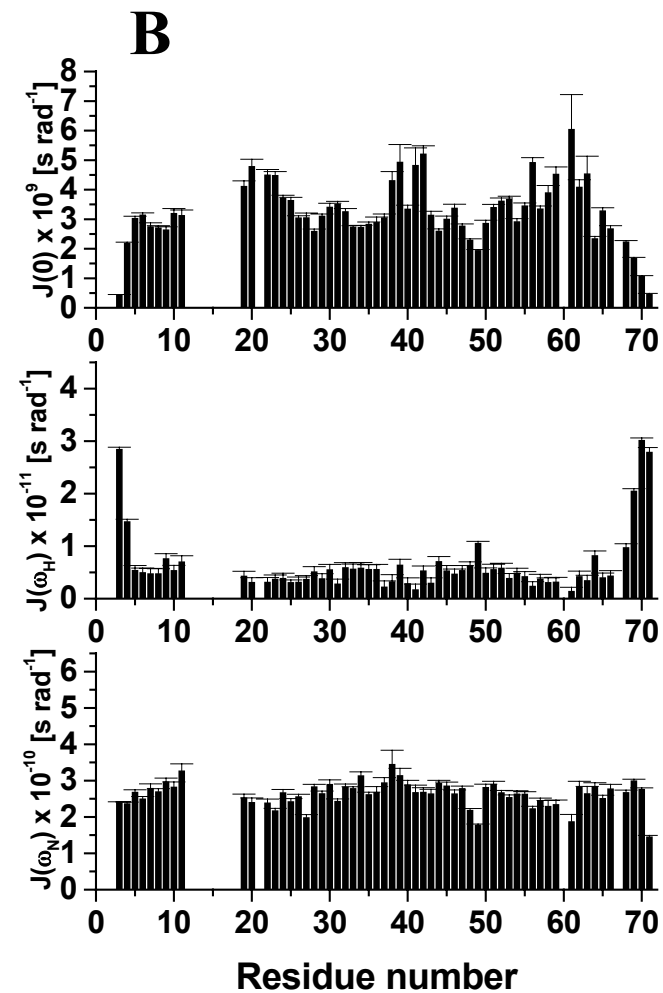

**Fig. S2**
